# Supplementary material
Source: PubMed Central journal article supplement (PMC124232)

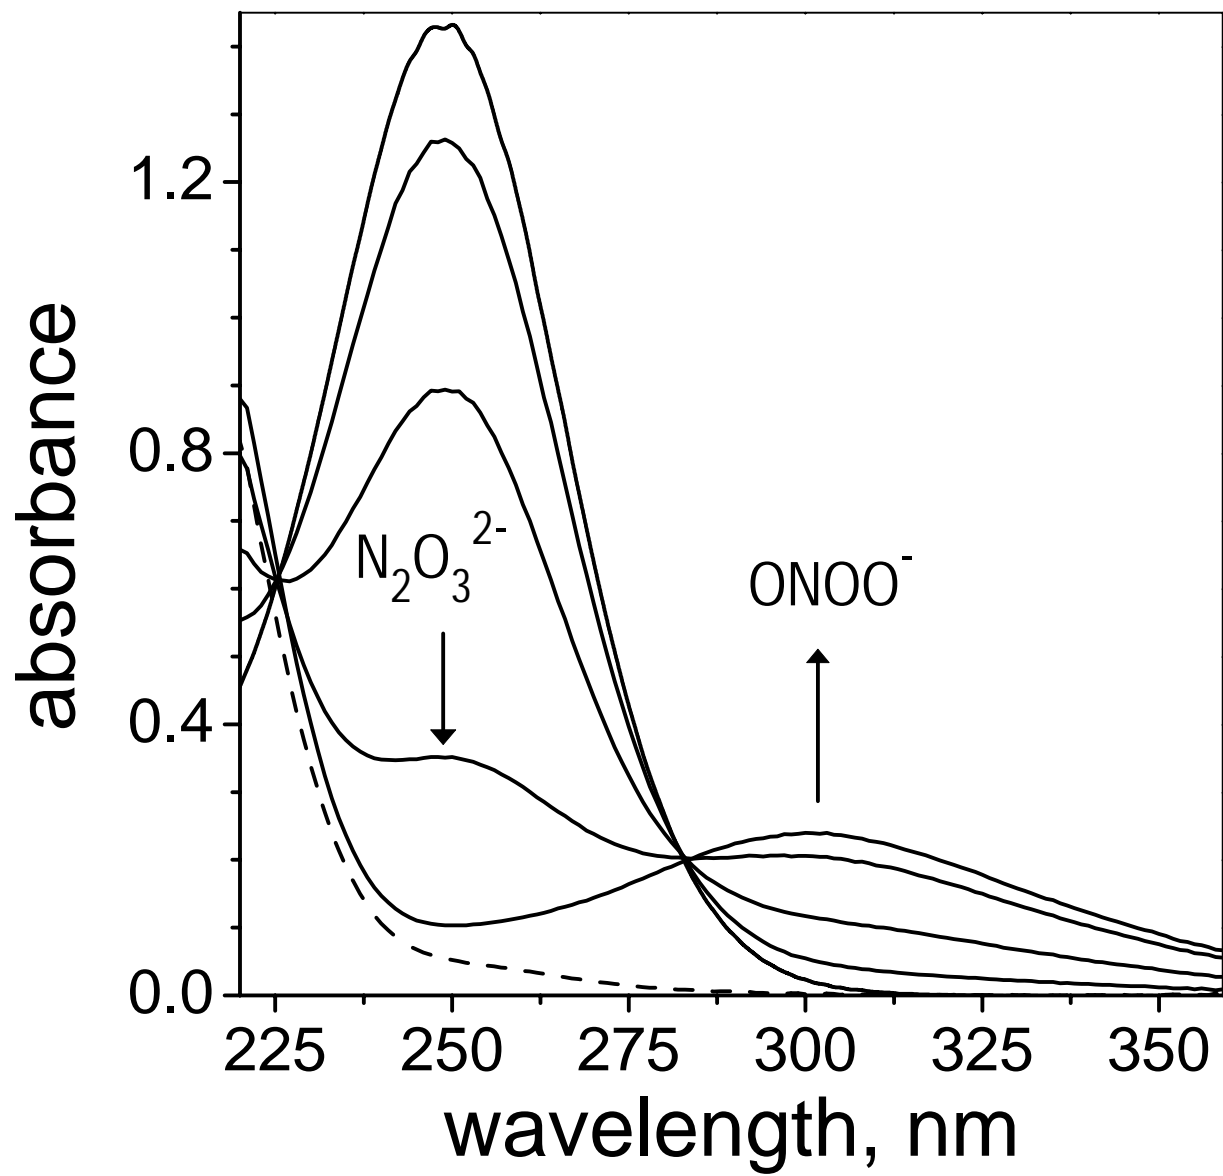

Supplement: pnas_112202099_6.pdf [file pnas_112202099_6.pdf]

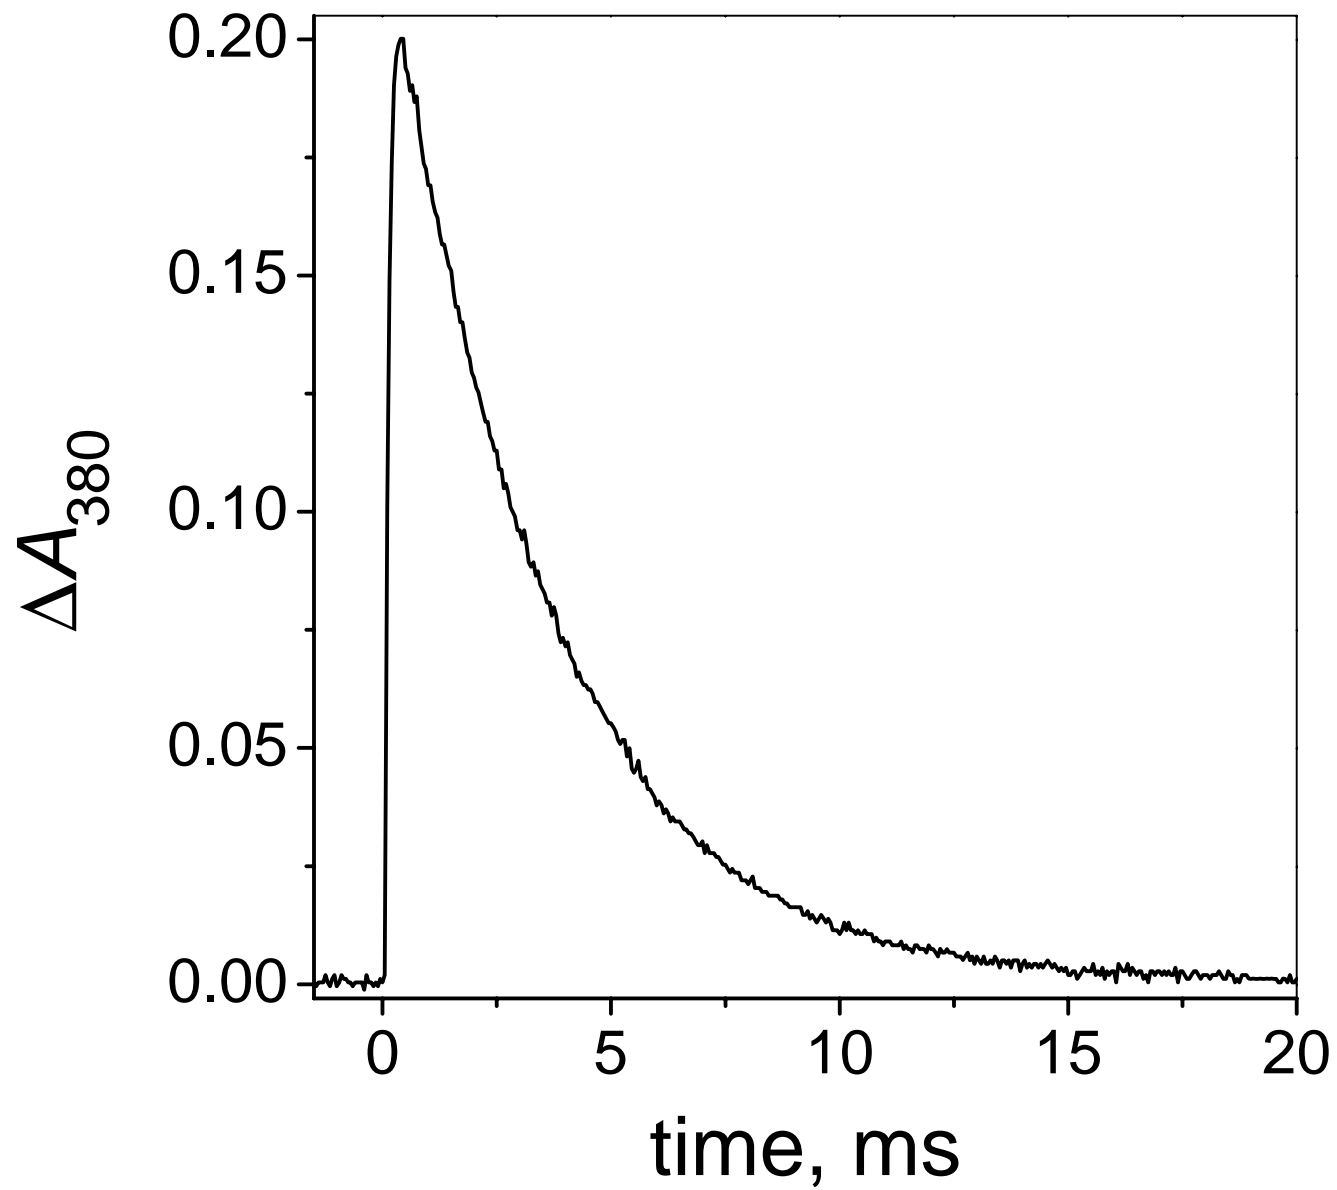

Supplement: pnas_112202099_8.pdf [file pnas_112202099_8.pdf]

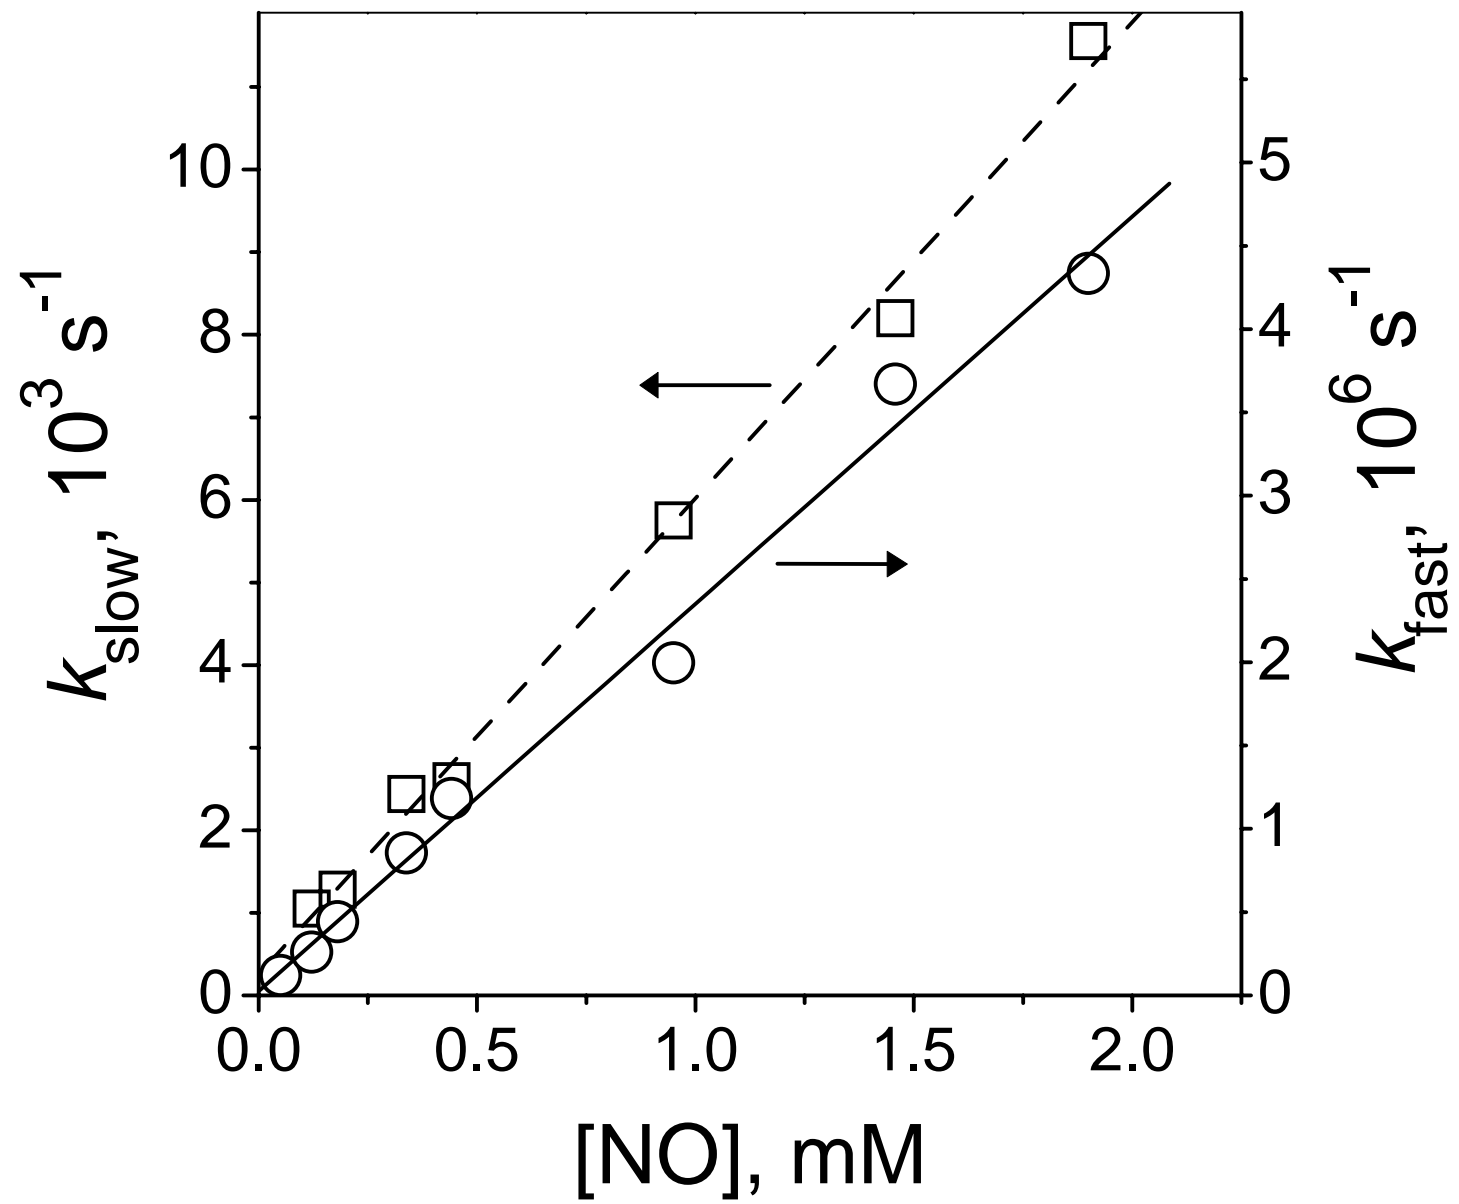

Supplement: pnas_112202099_9.pdf [file pnas_112202099_9.pdf]
